# Supplementary material for: Real-time monitoring of a controlled drug delivery system in vivo: construction of a near infrared fluorescence monomer conjugated with pH-responsive polymeric micelles
Source: Royal Society of Chemistry journal article supplement (doi:10.1039/c6tb00315j), 2016-01-01
Supplement: c6tb00315j1.pdf [file c6tb00315j1.pdf]

Supporting Information for

**Real-time monitoring controlled drug delivery system *in vivo*:  
construction by near infrared fluorescence monomer conjugated with  
pH-responsive polymeric micelles**

Li Chen,<sup>a</sup> Bizheng Chen,<sup>b</sup> Xiaodong Liu,<sup>a</sup> Yujie Xu,<sup>b</sup> Lifen Zhang,<sup>\*a</sup> Zhenping Cheng<sup>\*a</sup>  
and Xiulin Zhu<sup>a</sup>

<sup>a</sup>*Suzhou key Laboratory of Macromolecular Design and Precision Synthesis, Jiangsu Key Laboratory of Advanced Functional Polymer Design and Application, Department of Polymer Science and Engineering, College of Chemistry, Chemical Engineering and Materials Science, Soochow University, Suzhou 215123, China. Fax: +86-512-65882787, \*E-mail: [chengzhenping@suda.edu.cn](mailto:chengzhenping@suda.edu.cn) (Z. P. Cheng) or [zhanglifan@suda.edu.cn](mailto:zhanglifan@suda.edu.cn) (L. F. Zhang)*

<sup>b</sup>*School of Radiation Medicine and Protection, Medicine College of Soochow University, Suzhou 215123, China.*

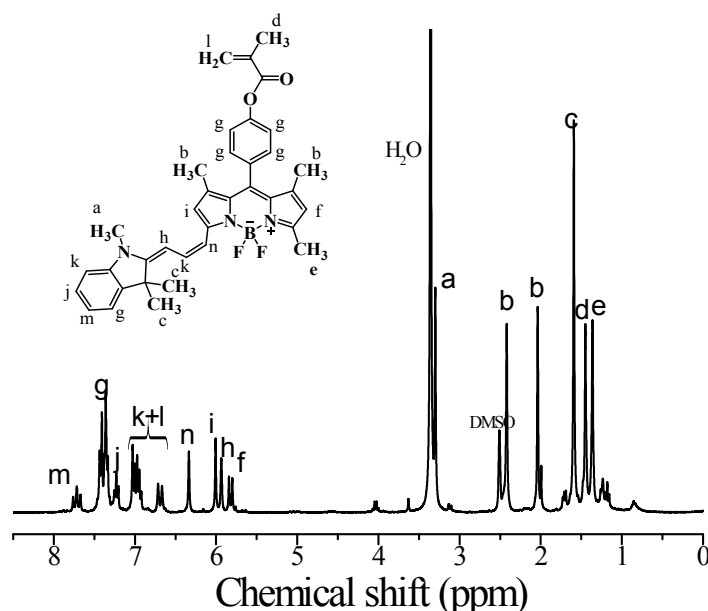

**Figure S1.** <sup>1</sup>H NMR spectrum of monomer NFM in DMSO-d<sub>6</sub>.

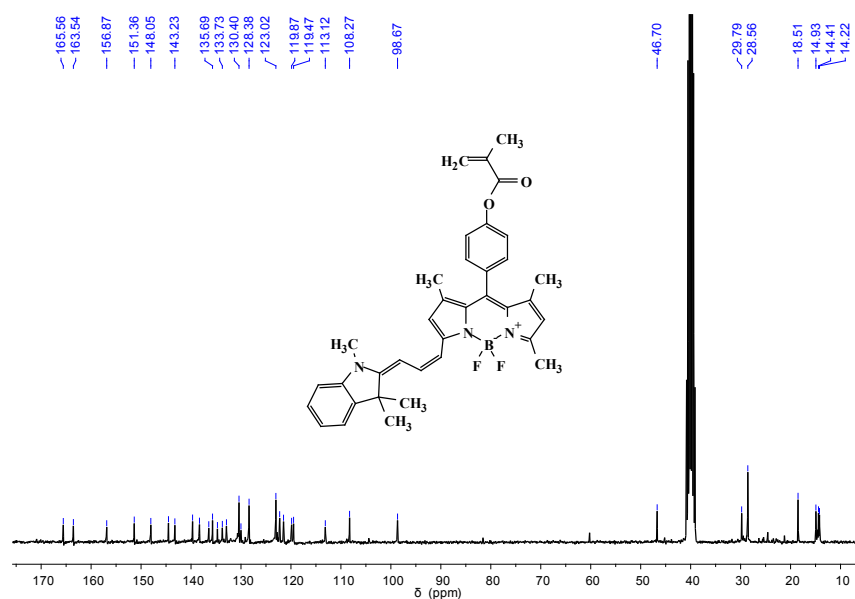

**Figure S2.**  $^{13}\text{C}$  NMR spectrum of monomer NFM in  $\text{DMSO-d}_6$ .

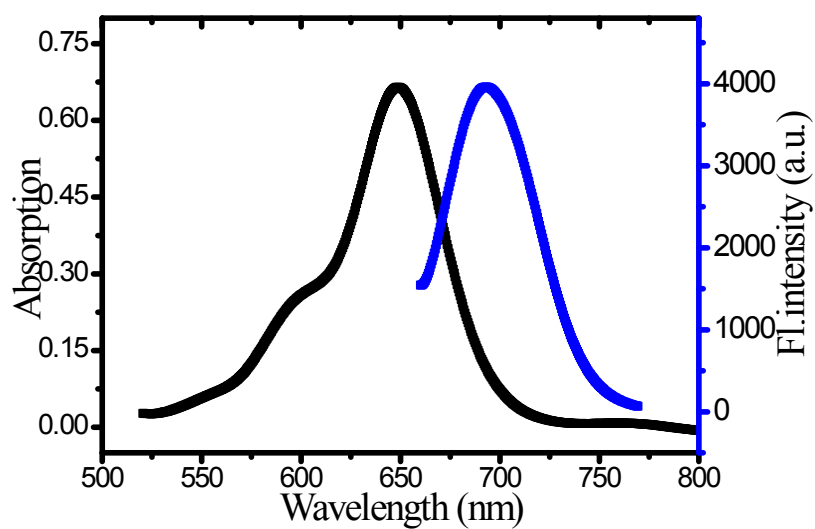

**Figure S3.** Absorption (black line) and emission (blue line,  $\lambda_{\text{ex}} = 549 \text{ nm}$ ) spectra of monomer NFM ( $5 \mu\text{g mL}^{-1}$ ) in the THF.

**Table S1.** Results of RAFT polymerization of PEGMA.

| Entry | Time (h) | [PEGMA] <sub>0</sub> : [CPDN] <sub>0</sub> : [AIBN] <sub>0</sub> | <i>M</i> <sub>n, GPC</sub> (g/mol) | <i>M</i> <sub>w</sub> / <i>M</i> <sub>n</sub> | T (°C) |
|-------|----------|------------------------------------------------------------------|------------------------------------|-----------------------------------------------|--------|
| 1     | 5        | 50:1:0.5                                                         | 20900                              | 1.11                                          | 60     |
| 2     | 5        | 60:1:0.5                                                         | 22200                              | 1.12                                          | 60     |
| 3     | 6        | 50:1:0.5                                                         | 21300                              | 1.11                                          | 60     |
| 4     | 6        | 60:1:0.5                                                         | 25900                              | 1.11                                          | 60     |
| 5     | 5        | 60:1:0.5                                                         | 28300                              | 1.19                                          | 75     |
| 6     | 5        | 70:1:0.5                                                         | 31400                              | 1.21                                          | 75     |

Polymerization conditions: *m*<sub>PEGMA</sub> = 3.25 g, *V*<sub>1,4-dioxane</sub> = 2.0 mL.

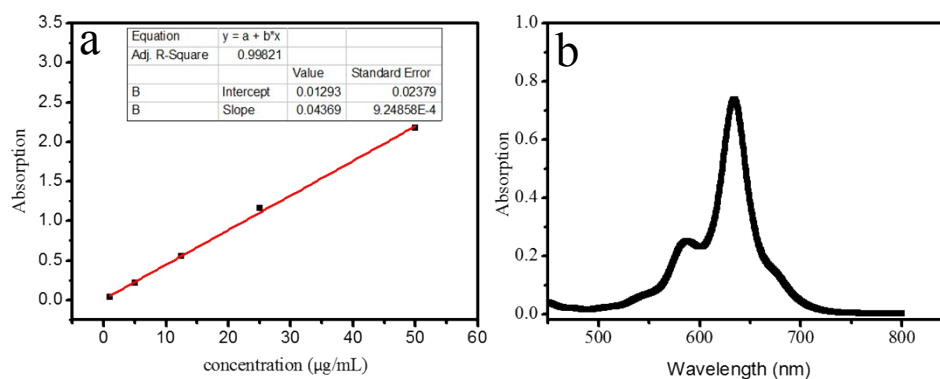

**Figure S4.** UV-vis spectra of monomer NFM with different concentration in hexane (a) and absorption of NFM unreacted in the hexane (150 mL).

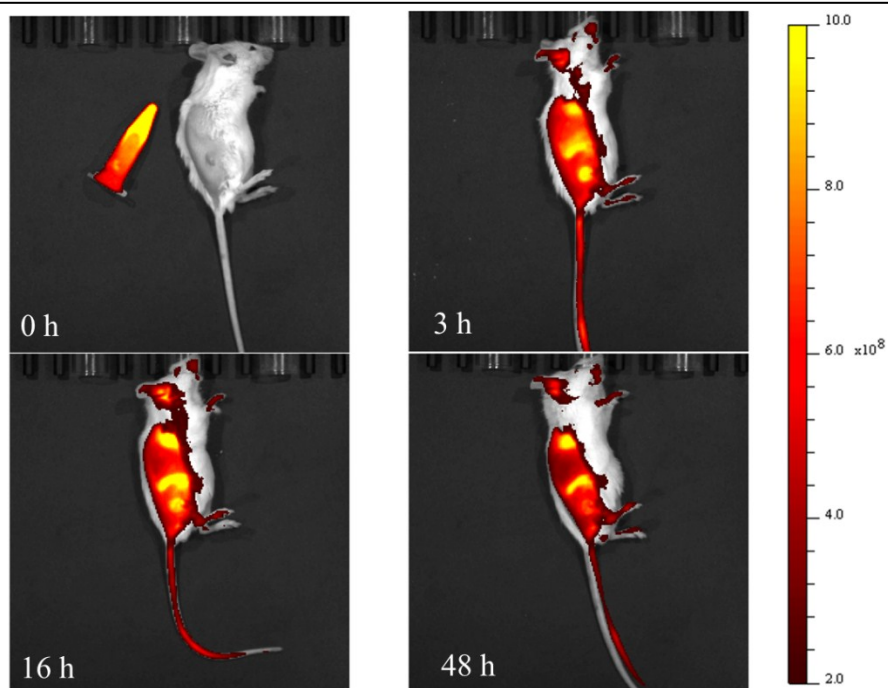

**Figure S5.** *In vivo* fluorescence images of the murine mammary carcinoma cell 4T1 mouse taken at different time points post injection of drug-loaded micelles (150  $\mu\text{L}$ , 40  $\text{mg mL}^{-1}$ ). Sample used for self-assembly: PPEGMA-*b*-P(DBAM-*co*-NFM),  $M_{n,\text{GPC}} = 27700 \text{ g mol}^{-1}$ ,  $M_w/M_n = 1.12$ .
